# Supplementary material for: Elucidating Sequence-Assembly Relationships for Bilingual PNA Biopolymers
Source: PubMed Central journal article supplement — ACS Omega. 2023 Sep 29;8(40):37442–50. doi: 10.1021/acsomega.3c05528 (PMC10569013; doi:10.1021/acsomega.3c05528), 2023-09-29
Supplement: ao3c05528_si_001.pdf [file ao3c05528_si_001.pdf]

## Supplemental Information

### Elucidating Sequence-Assembly Relationships for Bilingual PNA Biopolymers

Hector Argueta-Gonzalez<sup>a</sup>, Colin S. Swenson<sup>a</sup>, Kornelia J. Skowron<sup>b</sup>, Jennifer M. Heemstra<sup>ab\*</sup>

<sup>a</sup>Department of Chemistry, Emory University, Atlanta, GA, 30322, USA

<sup>b</sup>Department of Chemistry, Washington University, St. Louis, MO, 63130, USA

\* To whom correspondence should be addressed. Tel: +1 314 935 6593; Email: [heemstra@wustl.edu](mailto:heemstra@wustl.edu)

### Table of Contents

|                                                                         |     |
|-------------------------------------------------------------------------|-----|
| <b>Figure S1.</b> Melting temperature measurements for PNA:DNA duplexes | S2  |
| <b>Table S1.</b> Calculated melting temperature measurements            | S3  |
| <b>Figure S2.</b> TEM images of PNA control sequences assembled         | S4  |
| <b>Figure S3.</b> CD spectroscopy of PNA control sequences and DNA      | S5  |
| <b>Table S2.</b> DLS sizes of PNA sequences                             | S6  |
| <b>Figure S4.</b> CMC studies of PNA sequences                          | S7  |
| <b>Figure S5.</b> Structure, HPLC, and ESI-TOF of PNA-A-B               | S8  |
| <b>Figure S6.</b> Structure, HPLC, and ESI-TOF of PNA-N-A               | S9  |
| <b>Figure S7.</b> Structure, HPLC, and ESI-TOF of PNA-10-A              | S10 |
| <b>Figure S8.</b> Structure, HPLC, and ESI-TOF of PNA-8-A               | S11 |
| <b>Figure S9.</b> Structure, HPLC, and ESI-TOF of PNA-N-C               | S12 |
| <b>Figure S10.</b> Structure, HPLC, and ESI-TOF of PNA-10-C             | S13 |
| <b>Figure S11.</b> Structure, HPLC, and ESI-TOF of PNA-8-C              | S14 |
| <b>Table S3.</b> PNA sequence, expected mass, and found mass            | S15 |

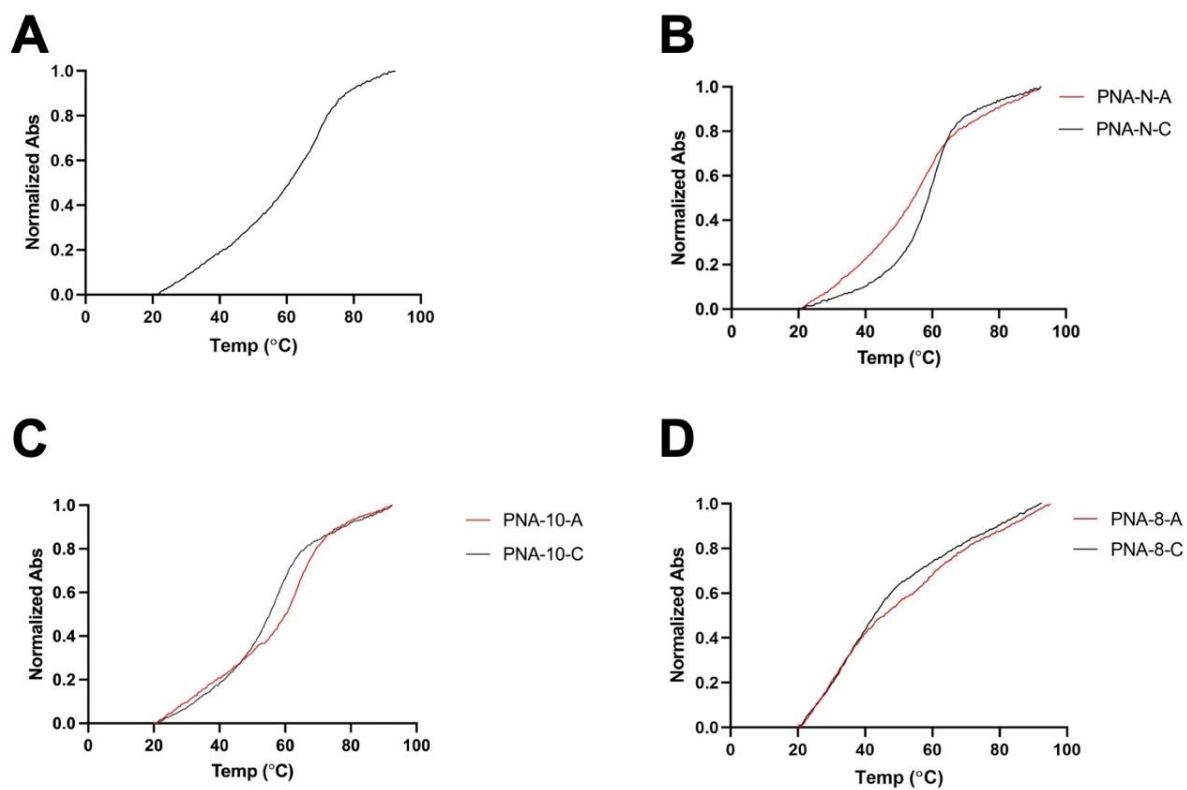

**Fig S1** UV-Vis melting curves using normalized absorbance. PNA samples were prepared at 3  $\mu$ M in 1X PBS with 3  $\mu$ M of DNA, final concentrations. (A) PNA-B-A. (B) PNA-N-A and PNA-N-C. (C) PNA-10-A and PNA-10-C. (D) PNA-8-A and PNA-8-C.

**Table S1** Melting temperature measurements using normalized absorbance using DNA

| Strand   | Melt Temp (°C) |
|----------|----------------|
| PNA-B-A  | 61.96 ± 0.92   |
| PNA-N-C  | 58.11 ± 0.09   |
| PNA-N-A  | 55.74 ± 0.38   |
| PNA-10-C | 54.32 ± 0.33   |
| PNA-10-A | 60.1 ± 0.73    |
| PNA-8-C  | 45.97 ± 1.4    |
| PNA-8-A  | 48.08 ± 1.11   |

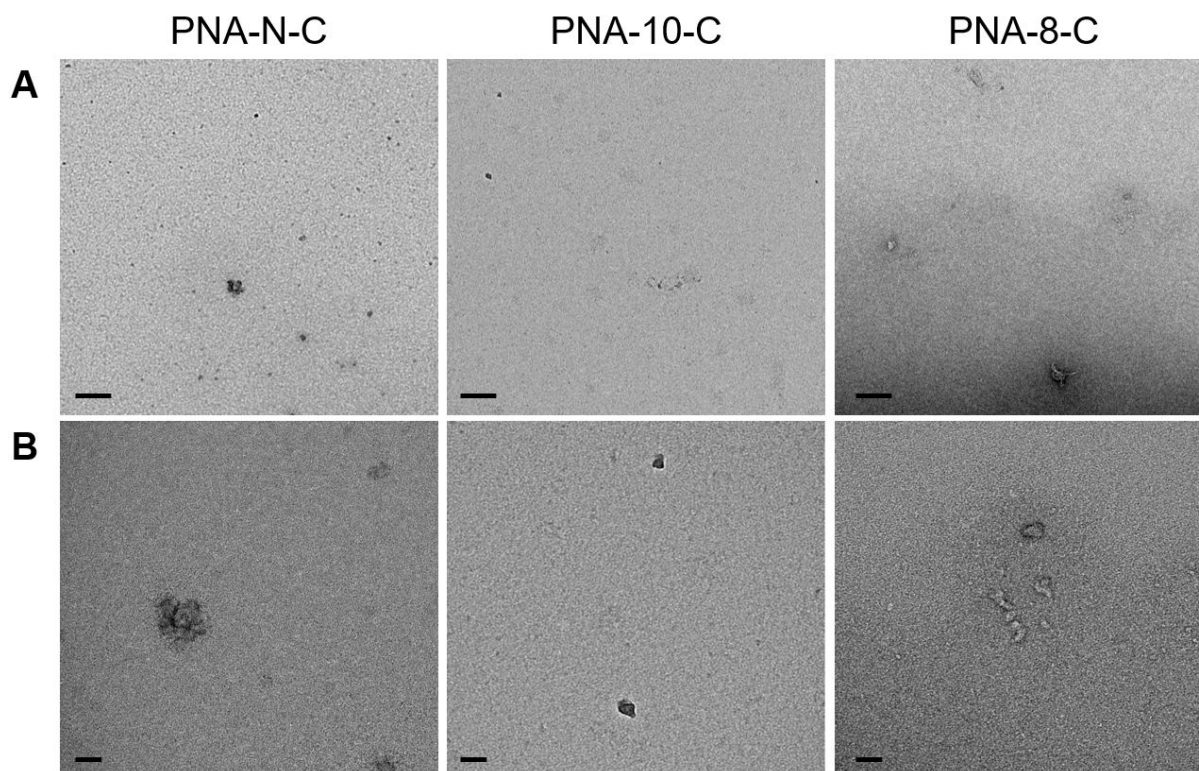

**Fig S2.** TEM images of PNA-N-C, PNA-10-C, and PNA-8-C assembled in water at 100  $\mu$ M. A) Scale bar = 200 nm. B) Scale bar = 50 nm.

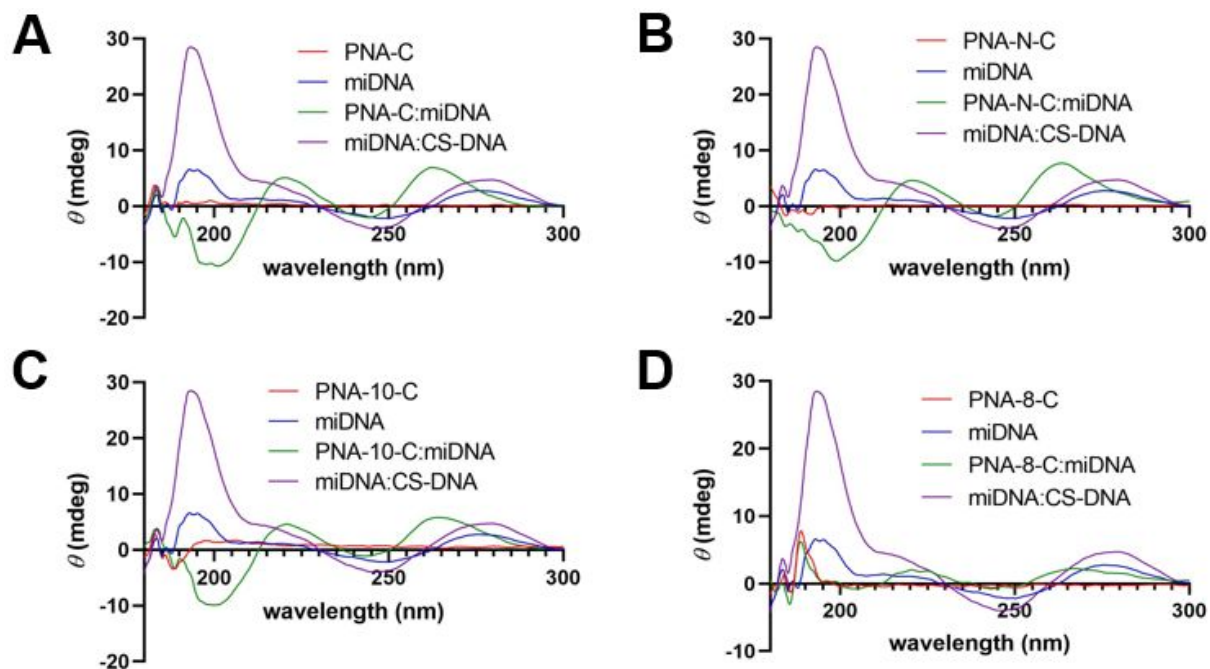

**Fig S3** CD Spectroscopy of A) PNA-C B) PNA-N-C C) PNA-10-C, and D) PNA-8-C in 1x PBS at 100  $\mu$ M to demonstrate the change in maxima and minima up on the addition of DNA.

**Table S2** Average Size of PNA Assembly Particles using DLS

| Strand   | Diameter                        |
|----------|---------------------------------|
| PNA-B-A  | 107.8 ± 47.0 nm                 |
| PNA-N-C  | 1.3 ± 0.1 nm<br>127.1 ± 36.3 nm |
| PNA-N-A  | 161.7 ± 44.4 nm                 |
| PNA-10-C | 1.6 ± 0.3 nm<br>191.9 ± 79.1 nm |
| PNA-10-A | 58.9 ± 17.8 nm                  |
| PNA-8-C  | 1.5 ± 0.3 nm<br>80.4 ± 22.8 nm  |
| PNA-8-A  | 70.0 ± 43.1 nm                  |

All sizes reported

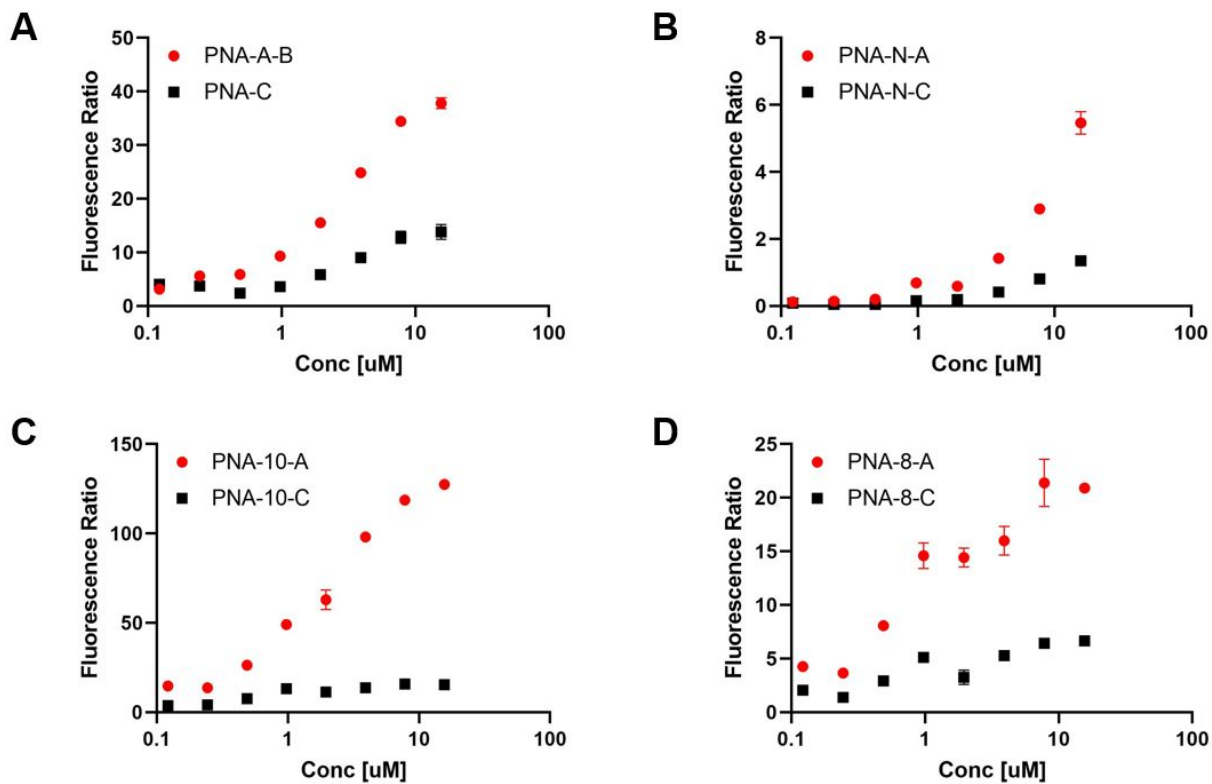

**Fig S4** Fluorescence Ratio studies as a function of concentration, testing amphiphilic and control PNA sequences in. Top left: PNA-A-B and PNA-C; Top right: PNA-N-A and PNA-N-C; Bottom left: PNA-10-A and PNA-10-C; Bottom right: PNA-8-A and PNA-8-C. Samples tested in 1%DMSO/water.

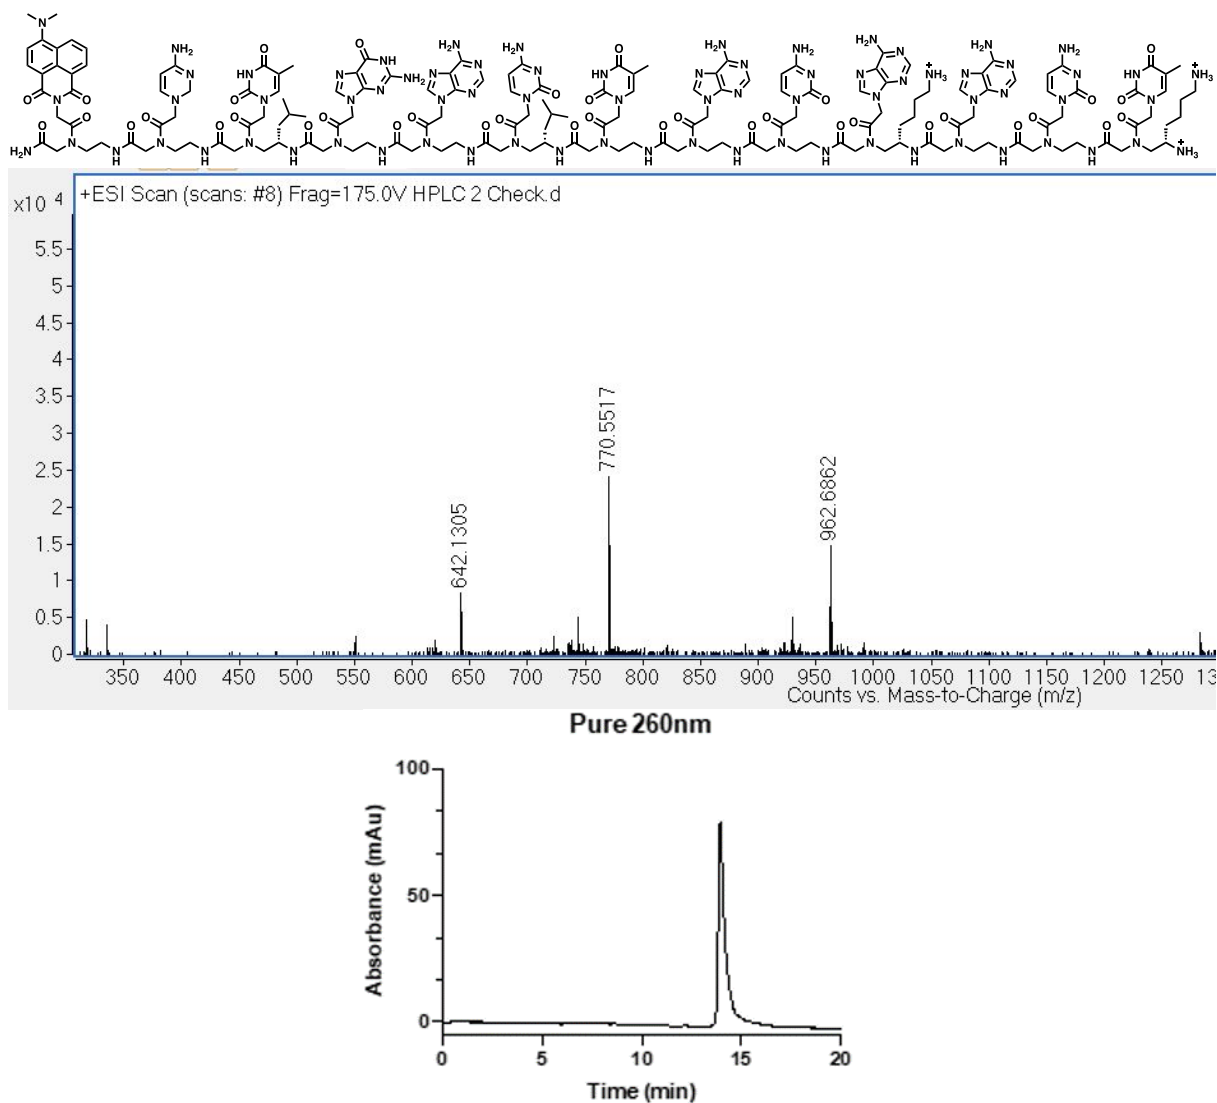

**Fig S5** The chemical structure of PNA-B-A. The mass of the sequence was confirmed using ESI-TOF mass spectrometry and purified using RP-HPLC.



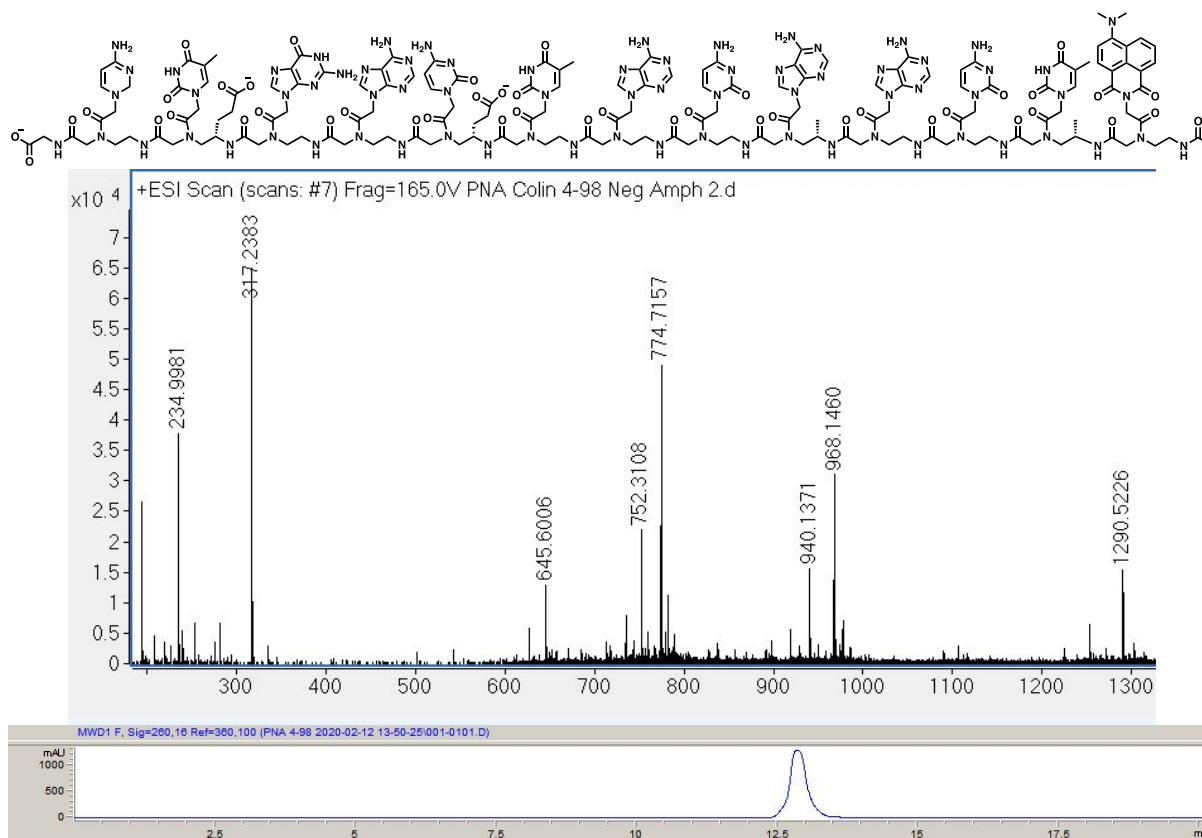

**Fig S6** The chemical structure of PNA-N-A. The mass of the sequence was confirmed using ESI-TOF mass spectrometry and purified using RP-HPLC.

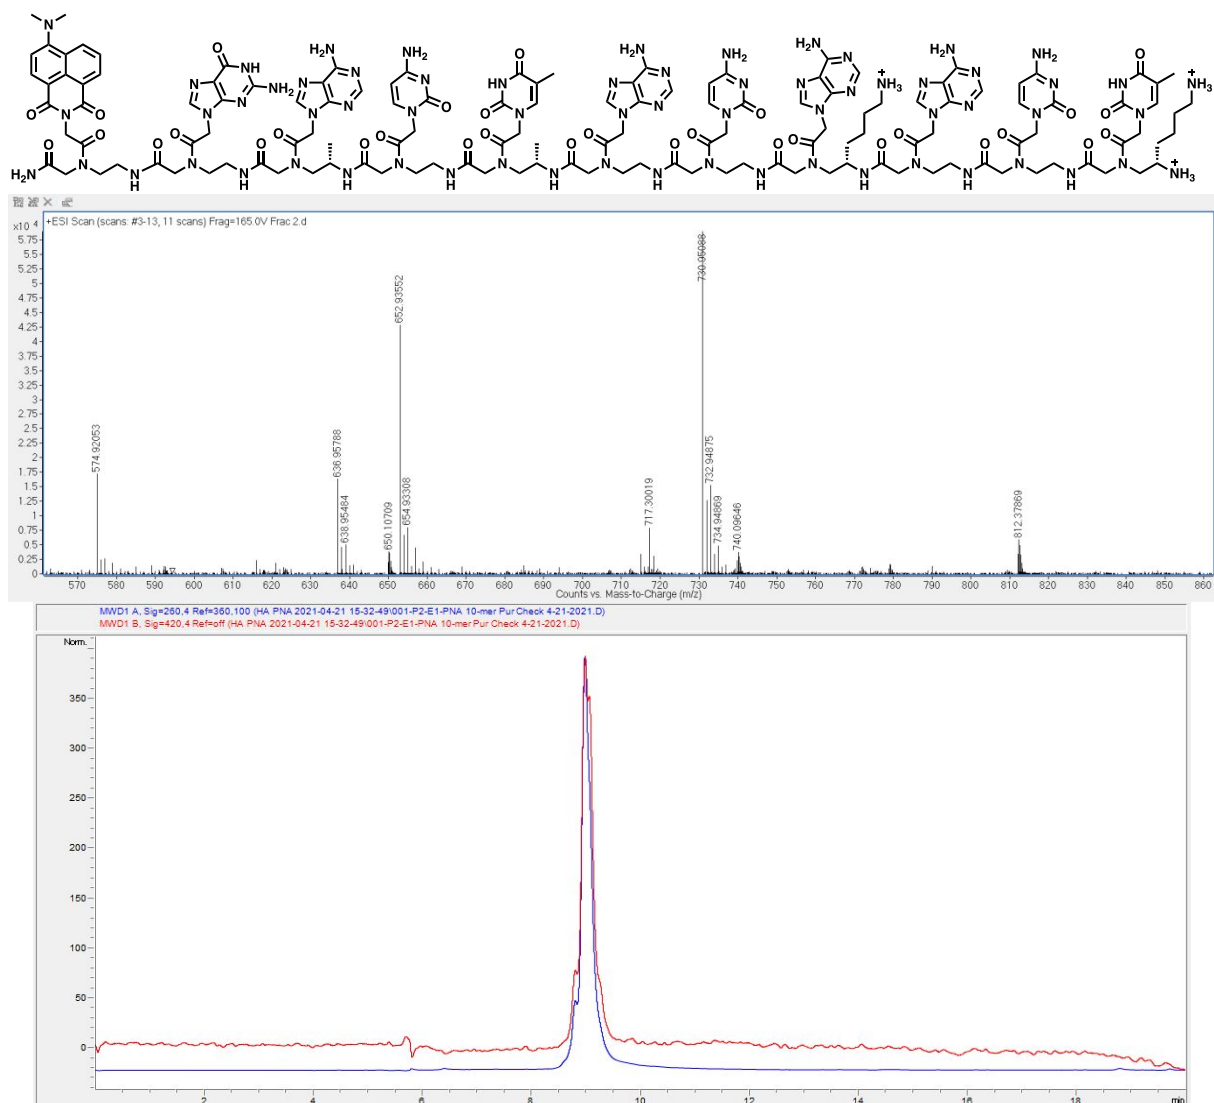

**Fig S7** The chemical structure of PNA-10-A. The mass of the sequence was confirmed using ESI-TOF mass spectrometry and purified using RP-HPLC.

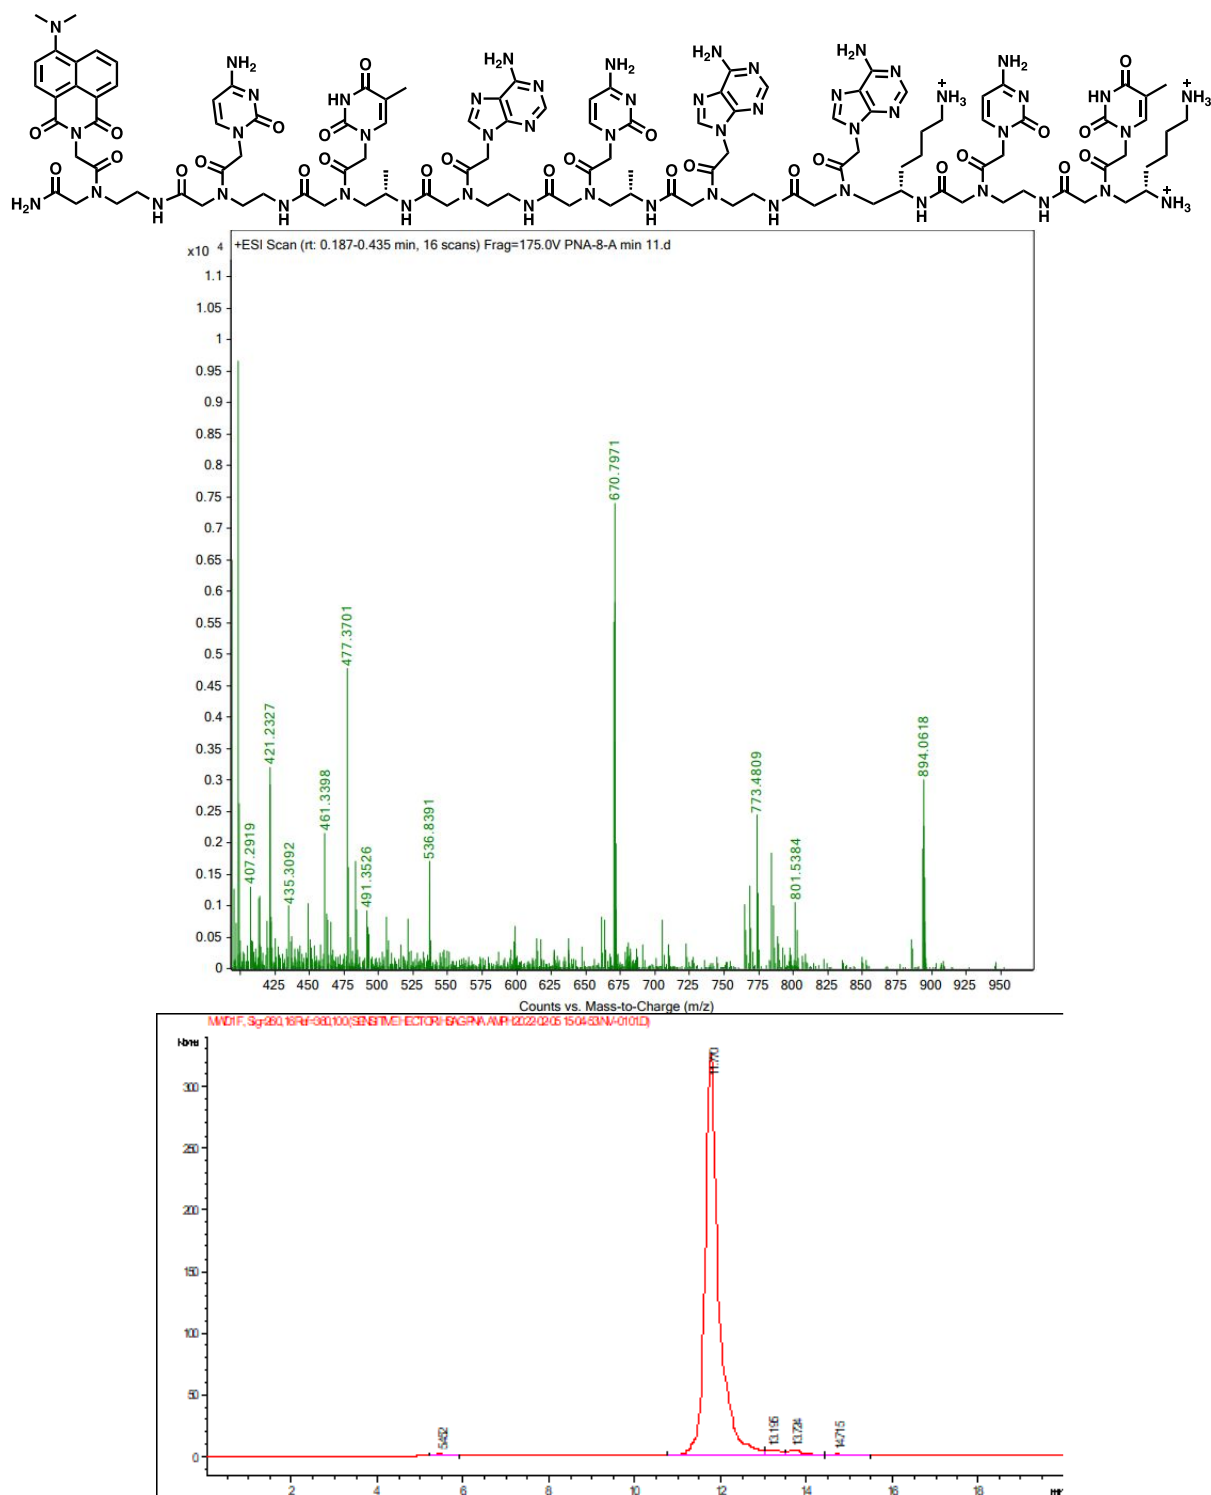

**Fig S8** The chemical structure of PNA-8-A. The mass of the sequence was confirmed using ESI-TOF mass spectrometry and purified using RP-HPLC.

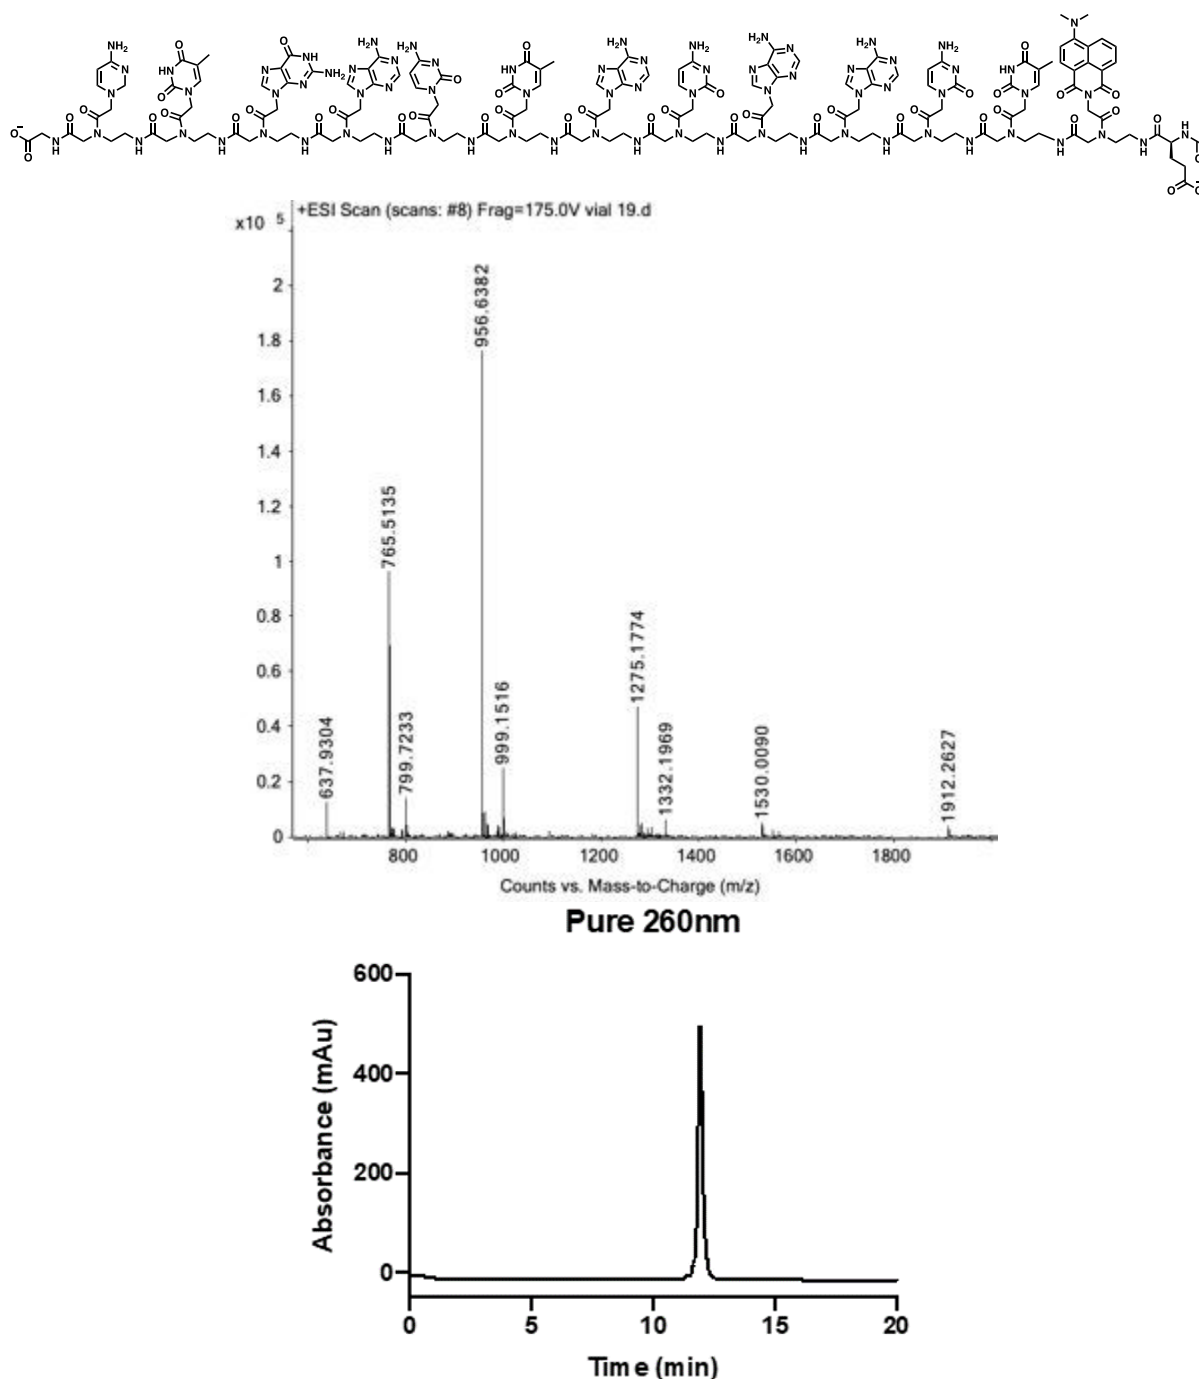

**Fig S9** The chemical structure of PNA-N-C. The mass of the sequence was confirmed using ESI-TOF mass spectrometry and purified using RP-HPLC.

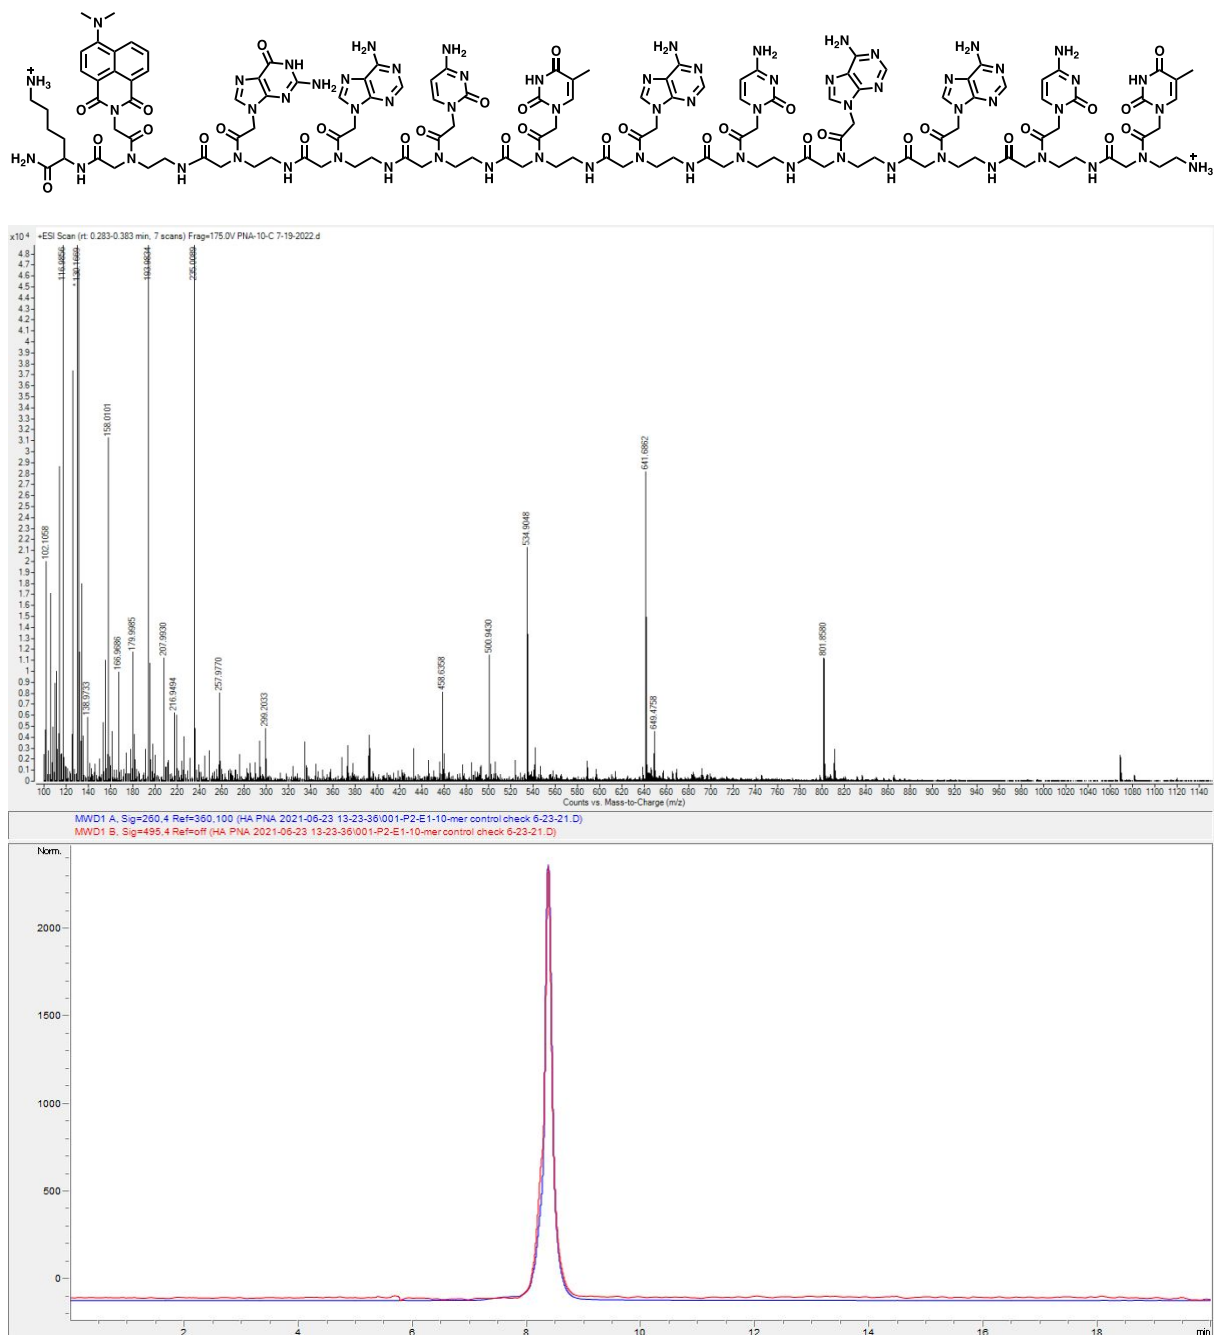

**Fig S10** The chemical structure of PNA-10-C. The mass of the sequence was confirmed using ESI-TOF mass spectrometry and purified using RP-HPLC.

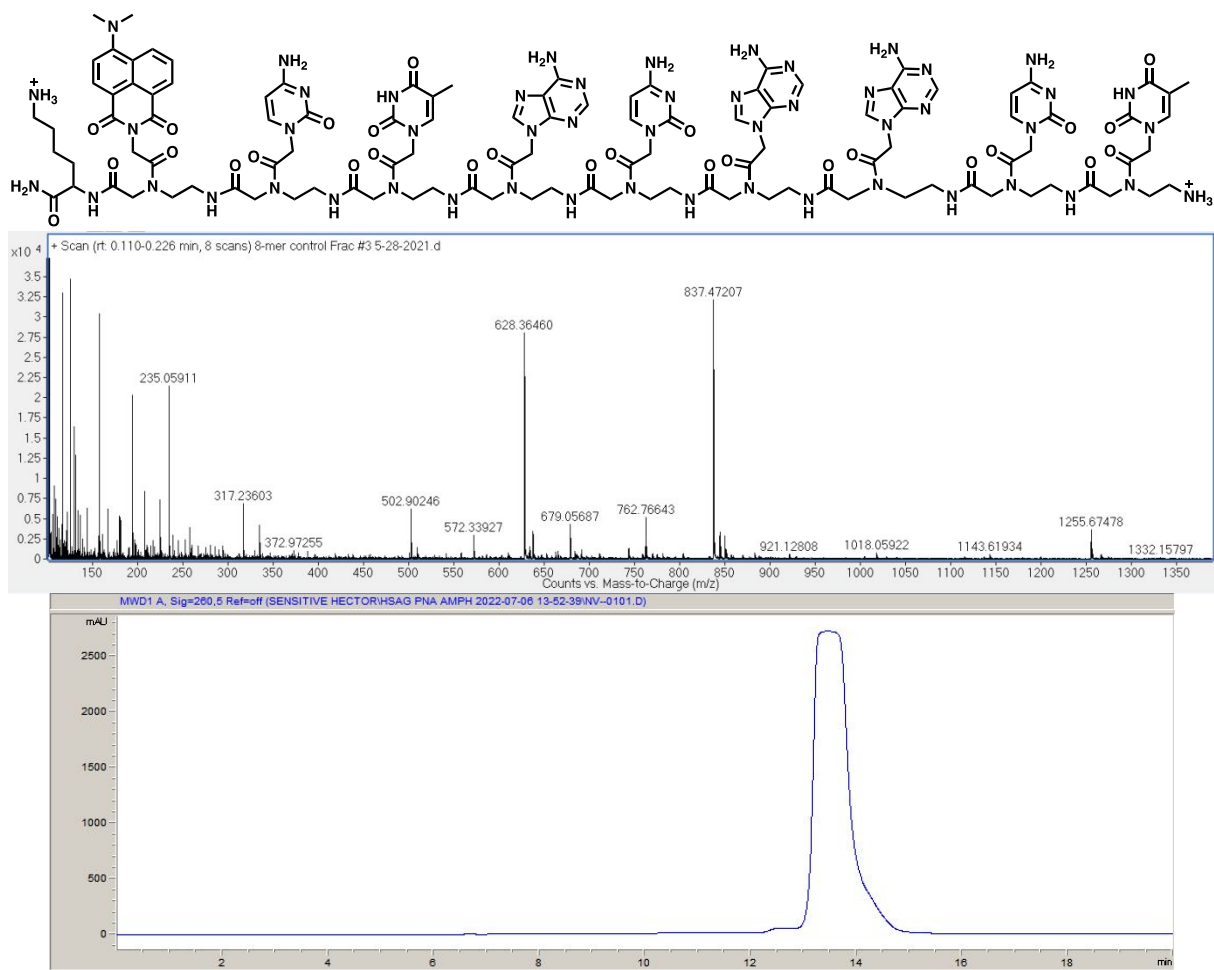

**Fig S11** The chemical structure of PNA-8-C. The mass of the sequence was confirmed using ESI-TOF mass spectrometry and purified using RP-HPLC.

**Table S3** PNA sequence, expected mass, and found mass

| Strand   | Expected Mass (M+3) <sup>3+</sup> | Found Mass (M+3) <sup>3+</sup> |
|----------|-----------------------------------|--------------------------------|
| PNA-B-A  | 962.212                           | 962.686                        |
| PNA-N-C  | 955.943                           | 956.638                        |
| PNA-N-A* | 1288.572*                         | 1290.523*                      |
| PNA-10-C | 801.123                           | 801.858                        |
| PNA-10-A | 811.882                           | 812.379                        |
| PNA-8-C  | 627.777                           | 628.365                        |
| PNA-8-A  | 670.321                           | 670.979                        |

\*Indicates mass expected and found were (M+2)<sup>2+</sup>
